# Supplementary material for: Genome Sequence of a Lancefield Group C Streptococcus zooepidemicus Strain Causing Epidemic Nephritis: New Information about an Old Disease
Source: PLoS One. 2008 Aug 21;3(8):e3026. doi: 10.1371/journal.pone.0003026 (PMC2516327; doi:10.1371/journal.pone.0003026)
Supplement: Figure S1 — Species-specific and genus-conserved gene content comparison. (A) CDS length. (B) CDS percent G+C composition. (C) CDS dinucleotide composition; graphed is the net absolute difference from the average dinucleotide frequency summed for all 16 dinucleotide pairs at all three codon positions (the higher the value the more atypical the nucleotide composition). (D) CDS codon adaptation index. Abbreviations: U&D, unique and divergent products (n = 464) relative to other sequenced streptococcal species; Con, conserved products (n = 1497) relative to other sequenced streptococcal species; all products (n = 1961) of the MGCS10565 genome. Bars show the ranges of values, boxed horizontal lines show the means, and the boxes show the standard errors about the means. Accompanying tables give results of unpaired t-test with Welch's correction. (0.40 MB PDF) [file pone.0003026.s001.pdf]

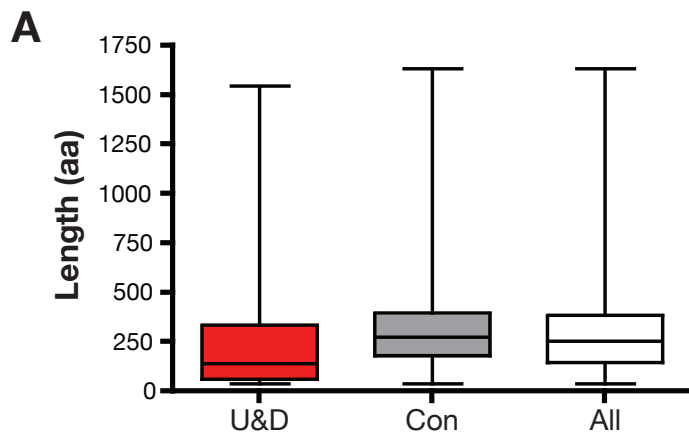

| Group | Mean          | Difference in Mean | P Value  |
|-------|---------------|--------------------|----------|
| All   | 291.7 ± 4.669 | 70.78 ± 11.21      | < 0.0001 |
| U&D   | 220.9 ± 10.19 |                    |          |
| All   | 291.7 ± 4.669 | 21.94 ± 6.920      | < 0.0001 |
| Con   | 313.6 ± 5.108 |                    |          |
| U&D   | 220.9 ± 10.19 | 92.71 ± 11.40      | < 0.0001 |
| Con   | 313.6 ± 5.108 |                    |          |

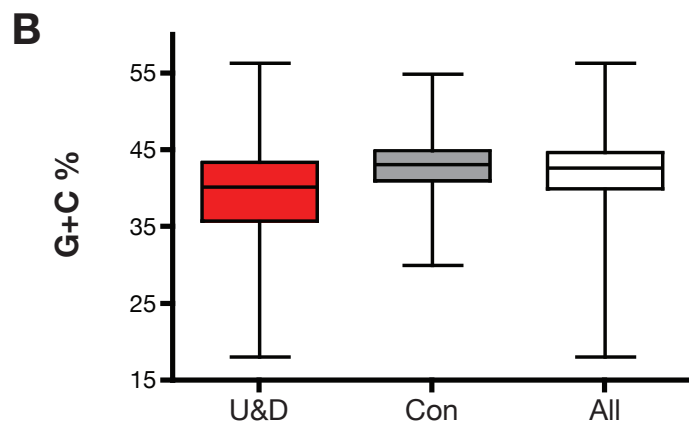

| Group | Mean           | Difference in Mean | P Value  |
|-------|----------------|--------------------|----------|
| All   | 42.03 ± 0.0928 | 2.397 ± 0.276      | < 0.0001 |
| U&D   | 39.63 ± 0.2600 |                    |          |
| All   | 42.03 ± 0.0928 | 0.743 ± 0.1239     | < 0.0001 |
| Con   | 42.77 ± 0.0821 |                    |          |
| U&D   | 39.63 ± 0.2600 | 3.139 ± 0.2726     | < 0.0001 |
| Con   | 42.77 ± 0.0821 |                    |          |

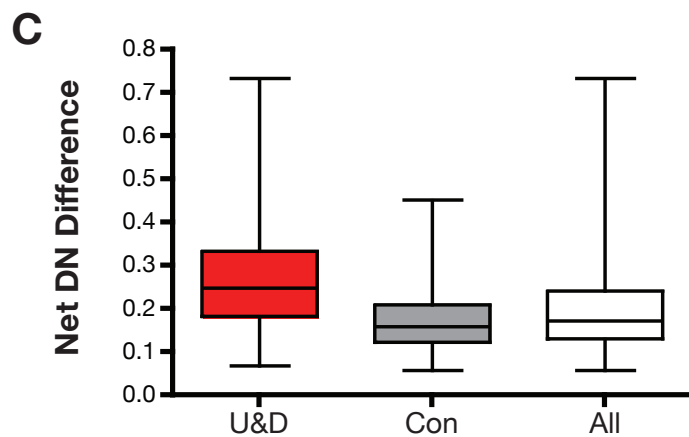

| Group | Mean            | Difference in Mean | P Value  |
|-------|-----------------|--------------------|----------|
| All   | 0.1942 ± 0.0002 | 0.0729 ± 0.0054    | < 0.0001 |
| U&D   | 0.2671 ± 0.0050 |                    |          |
| All   | 0.1942 ± 0.0002 | 0.0226 ± 0.0026    | < 0.0001 |
| Con   | 0.1716 ± 0.0017 |                    |          |
| U&D   | 0.2671 ± 0.0050 | 0.0956 ± 0.0053    | < 0.0001 |
| Con   | 0.1716 ± 0.0017 |                    |          |

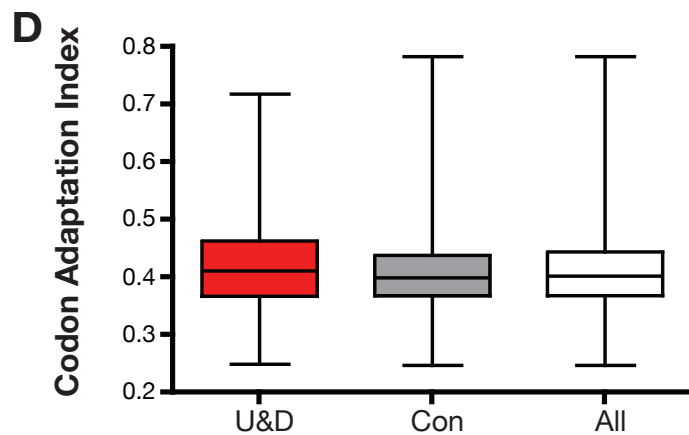

| Group | Mean            | Difference in Mean | P Value  |
|-------|-----------------|--------------------|----------|
| All   | 0.4139 ± 0.0016 | 0.0055 ± 0.0038    | < 0.1411 |
| U&D   | 0.4195 ± 0.0034 |                    |          |
| All   | 0.4139 ± 0.0016 | 0.0017 ± 0.0024    | < 0.4844 |
| Con   | 0.4122 ± 0.0018 |                    |          |
| U&D   | 0.4195 ± 0.0034 | 0.0072 ± 0.0039    | < 0.0606 |
| Con   | 0.4122 ± 0.0018 |                    |          |
