# Supplementary material for: Genome Sequence of a Lancefield Group C Streptococcus zooepidemicus Strain Causing Epidemic Nephritis: New Information about an Old Disease
Source: PubMed Central journal article supplement (PMC2516327; doi:10.1371/journal.pone.0003026), 2008-08-21
Supplement: pone.0003026.s002.pdf [file pone.0003026.s002.pdf]

**Table S1. Products with Predicted Sec-Dependent Secretion Signal Sequence**

| <b>Gene Tag</b> | <b>Length</b> | <b>Cleavage Site</b> | <b>CWA</b> | <b>Product/Function</b>                                        |
|-----------------|---------------|----------------------|------------|----------------------------------------------------------------|
| Sez_0018        | 392aa         | 24-25: VGA-DD        | --         | muramidase                                                     |
| Sez_0029        | 384aa         | 38-39: VHA-AV        | --         | muramidase                                                     |
| Sez_0099        | 428aa         | 37-38: VHA-EA        | LPATG      | ScIZ.1, streptococcal collagen-like protein of zooepidemicus 1 |
| Sez_0100        | 383aa         | 37-38: VKA-DV        | LPATG      | ScIZ.2, streptococcal collagen-like protein of zooepidemicus 2 |
| Sez_0110        | 184aa         | 26-27: ANA-DA        | --         | hypothetical protein function unknown                          |
| Sez_0156        | 580aa         | 26-27: AQA-DV        | --         | PG endopeptidase/protease                                      |
| Sez_0162        | 335aa         | 35-36: VQA-QE        | LPATG      | ScIZ.3, streptococcal collagen-like protein of zooepidemicus 3 |
| Sez_0164        | 392aa         | 37-38: VKA-DV        | LPSTG      | IgG-binding protein                                            |
| Sez_0185        | 559aa         | 38-39: VGA-ET        | LPATA      | IgG-binding protein                                            |
| Sez_0190        | 462aa         | 37-38: VKA-ED        | LPATG      | ScIZ.4, streptococcal collagen-like protein of zooepidemicus 4 |
| Sez_0213        | 336aa         | 37-38: AKA-EE        | LPATG      | ScIZ.5, streptococcal collagen-like protein of zooepidemicus 5 |
| Sez_0265        | 834aa         | 36-37: VKA-DD        | --         | surface exclusion protein                                      |
| Sez_0310        | 147aa         | 44-45: VSA-ST        | --         | conserved protein function unknown                             |
| Sez_0313        | 576aa         | 37-38: VMA-DK        | LPQTS      | fibronectin-binding protein                                    |
| Sez_0338        | 326aa         | 41-42: VRA-DV        | LPSTG      | M-like protein                                                 |
| Sez_0370        | 471aa         | 27-28: VLA-ED        | --         | muramidase                                                     |
| Sez_0371        | 1251aa        | 26-27: VRS-EA        | --         | Fe(3+) siderophore                                             |
| Sez_0372        | 293aa         | 29-30: AYA-DK        | NPLSV      | heme-binding protein                                           |
| Sez_0432        | 98aa          | 29-30: KAA-NE        | --         | hypothetical protein function unknown                          |
| Sez_0446        | 345aa         | 32-33: VQA-ST        | --         | esterase/lipase                                                |
| Sez_0475        | 250aa         | 37-38: PAA-IT        | --         | conserved protein possible protease                            |

| <b>Gene Tag</b> | <b>Length</b> | <b>Cleavage Site</b> | <b>CWA</b> | <b>Product/Function</b>                                                  |
|-----------------|---------------|----------------------|------------|--------------------------------------------------------------------------|
| Sez_0499        | 482aa         | 31-32: ILA-EQ        | LPRTN      | Fnz-like, fibronectin-binding protein, factor H-binding protein          |
| Sez_0500        | 522aa         | 31-32: VLA-EQ        | LPKTN      | ScIZ.6, streptococcal collagen-like protein of zooepidemicus 6           |
| Sez_0511        | 1634aa        | 34-35: VAA-EE        | LPSTG      | interleukin 8 protease                                                   |
| Sez_0513        | 394aa         | 33-34: VSA-AT        | LPSTG      | albumin-binding protein                                                  |
| Sez_0532        | 174aa         | 24-25: VLA-ND        | --         | conserved protein function unknown                                       |
| Sez_0560        | 370aa         | 30-31: GYA-TS        | --         | secreted protein processing/maturation                                   |
| Sez_0577        | 345aa         | 32-33: YYI-EM        | --         | Lon-like protease                                                        |
| Sez_0608        | 441aa         | 31-32: ARA-EH        | LPATG      | ScIZ.7, streptococcal collagen-like protein of zooepidemicus 7           |
| Sez_0623        | 290aa         | 26-27: VTA-EQ        | LPLTG      | conserved protein function unknown                                       |
| Sez_0625        | 280aa         | 25-26: VLA-VL        | --         | lipase                                                                   |
| Sez_0668        | 387aa         | 27-28: FPA-SE        | --         | SdzD, streptodornase D of zooepidemicus                                  |
| Sez_0696        | 445aa         | 46-47: VGA-LD        | LPTTG      | Zag, zooepidemicus albumin/IgG-binding protein                           |
| Sez_0709        | 282aa         | 28-29: AHS-DN        | --         | muramidase                                                               |
| Sez_0729        | 343aa         | 36-37: VQA-SD        | LPSTG      | ScIZ.8, streptococcal collagen-like protein of zooepidemicus 8           |
| Sez_0736        | 516aa         | 28-29: VLA-DS        | --         | Zn ABC transporter substrate-binding lipoprotein                         |
| Sez_0755        | 252aa         | 29-30: VDA-AR        | --         | SdzA, streptodornase A of zooepidemicus                                  |
| Sez_0772        | 91aa          | 34-35: VFA-AT        | --         | hypothetical protein function unknown                                    |
| Sez_0781        | 926aa         | 27-28: VTA-QS        | LPKTG      | extracellular nuclease                                                   |
| Sez_0809        | 377aa         | 33-34: VAA-DT        | LPSTG      | M-protein ortholog, Szp                                                  |
| Sez_0811        | 665aa         | 38-39: VRA-TN        | LPTDG      | FszA (Cnz), collagen-binding fimbrial subunit protein A of zooepidemicus |
| Sez_0812        | 478aa         | 25-26: AFA-DT        | LPSTG      | FszB, T-Ag-like fimbrial subunit protein B of zooepidemicus              |
| Sez_0814        | 392aa         | 40-41: VSG-EV        | --         | IdeZ, IgG endopeptidase of zooepidemicus                                 |
| Sez_0815        | 400aa         | 39-40: ISA-DS        | LPSTG      | hypothetical protein function unknown                                    |

| <b>Gene Tag</b>       | <b>Length</b>  | <b>Cleavage Site</b> | <b>CWA</b> | <b>Product/Function</b>                                        |
|-----------------------|----------------|----------------------|------------|----------------------------------------------------------------|
| Sez_0820              | 1238aa         | 49-50: AAA-ES        | LPKTG      | pullulanase                                                    |
| Sez_0826              | 713aa          | 21-22: YYC-CD        | --         | conserved protein function unknown                             |
| Sez_0861              | 225aa          | 28-29: VNA-NT        | LPKTG      | mucin-binding protein                                          |
| *Sez_0872<br>Sez_0873 | 149aa<br>199aa | 34-35: TYA-DD        | --         | IgG endopeptidase, Mac 1-like                                  |
| Sez_0946              | 1123aa         | 37-38: VFA-EE        | LPKTS      | ScpZ, streptococcal C5a peptidase of zooepidemicus             |
| Sez_0956              | 85aa           | 29-30: SSA-KK        | --         | hypothetical protein function unknown                          |
| Sez_0970              | 283aa          | 26-27: VFA-EN        | FPKTG      | bacteriocin immunity modification protein                      |
| Sez_1016              | 323aa          | 25-26: HAA-EN        | --         | conserved protein function unknown                             |
| Sez_1056              | 357aa          | 32-33: SSA-SQ        | --         | polyamine-binding protein                                      |
| Sez_1069              | 268aa          | 31-32: SVA-DT        | --         | SdzB, streptodornase B of zooepidemicus                        |
| Sez_1073              | 1003aa         | 28-29: VFA-LE        | LPKTG      | RBC-binding protein                                            |
| Sez_1088              | 668aa          | 27-28: VQA-DQ        | LPATG      | 5'-nucleotidase                                                |
| Sez_1102              | 199aa          | 36-37: ASA-KD        | --         | muramidase                                                     |
| Sez_1114              | 1161aa         | 32-33: VFA-EP        | LPKTG      | serine protease subtilisin-like                                |
| Sez_1122              | 420aa          | 41-42: TIS-DQ        | --         | conserved protein function unknown                             |
| Sez_1264              | 719aa          | 24-25: VFA-IE        | --         | alpha-amylase                                                  |
| Sez_1268              | 417aa          | 25-26: FSF-PT        | --         | DltD, D-Ala transfer protein                                   |
| Sez_1299              | 1063aa         | 28-29: VLA-EE        | --         | hyaluronidase                                                  |
| Sez_1323              | 1048aa         | 27-28: YVA-TT        | --         | conserved protein function unknown                             |
| Sez_1356              | 134aa          | 32-33: SEA-VD        | --         | conserved protein function unknown                             |
| Sez_1363              | 108aa          | 26-27: VEA-FS        | --         | conserved protein function unknown                             |
| Sez_1385              | 101aa          | 20-21: VSA-AT        | --         | conserved protein function unknown                             |
| Sez_1421              | 498aa          | 31-32: VLA-EQ        | --         | ScIZ.9, streptococcal collagen-like protein of zooepidemicus 9 |

| <b>Gene Tag</b>       | <b>Length</b>  | <b>Cleavage Site</b> | <b>CWA</b> | <b>Product/Function</b>                                          |
|-----------------------|----------------|----------------------|------------|------------------------------------------------------------------|
| Sez_1425              | 1546aa         | 42-43: VFA-ED        | --         | sialidase/neuraminidase                                          |
| Sez_1457              | 666aa          | 31-32: VLA-EE        | LPKTN      | ScIZ.10, streptococcal collagen-like protein of zooepidemicus 10 |
| Sez_1480              | 238aa          | 22-23: VKA-DD        | --         | conserved protein function unknown                               |
| Sez_1481              | 200aa          | 28-29: STA-DQ        | --         | surface protein of unknown function, ErfK family                 |
| Sez_1582              | 275aa          | 29-30: VTA-RQ        | --         | ABC transporter AA-binding protein                               |
| Sez_1583              | 151aa          | 25-26: IYS-TD        | --         | hypothetical protein function unknown                            |
| Sez_1592              | 372aa          | 25-26: FVA-QK        | --         | conserved protein function unknown                               |
| *Sez_1598<br>Sez_1599 | 117aa<br>389aa | 35-36: AHA-EE        | LPATG      | ScIZ.11, streptococcal collagen-like protein of zooepidemicus 11 |
| Sez_1698              | 428aa          | 38-39: AQA-DH        | --         | peptidoglycan D,D-carboxypeptidase                               |
| Sez_1699              | 411aa          | 21-22: SLA-ED        | --         | peptidoglycan D,D-carboxypeptidase                               |
| Sez_1700              | 393aa          | 23-24: VHA-ED        | --         | peptidoglycan D,D-carboxypeptidase                               |
| Sez_1710              | 522aa          | 24-25: VQA-DH        | --         | ABC transporter glutamine-binding protein                        |
| Sez_1724              | 469aa          | 38-39: ASA-QE        | --         | alpha-amylase                                                    |
| Sez_1735              | 803aa          | 20-21: TNA-AS        | --         | histidine triad extracellular protein                            |
| Sez_1737              | 515aa          | 28-29: YNT-YT        | LPRSG      | conserved protein function unknown                               |
| Sez_1748              | 52aa           | 35-36: SYA-NN        | --         | hypothetical protein function unknown                            |
| Sez_1752              | 265aa          | 29-30: VAA-QD        | --         | conserved protein function unknown                               |
| Sez_1759              | 482aa          | 35-36: AFA-EQ        | LPKTH      | fibronectin-binding protein, fimbrial subunit like               |
| Sez_1775              | 424aa          | 36-37: VKA-NH        | --         | Skc, streptokinase plasminogen activator of GCS                  |
| Sez_1778              | 405aa          | 36-37: AEA-QL        | LPSTG      | streptococcal protective antigen-like surface protein            |
| Sez_1802              | 457aa          | 42-43: AFA-DE        | LPATG      | surface protein M-like                                           |
| Sez_1803              | 359aa          | 37-38: VKA-DQ        | LPATG      | ScIZ.12, streptococcal collagen-like protein of zooepidemicus 12 |
| Sez_1821              | 549aa          | 32-33: ILA-LS        | LPSTG      | FszC, fimbrial subunit protein C of zooepidemicus                |

| Gene Tag  | Length | Cleavage Site | CWA   | Product/Function                                                      |
|-----------|--------|---------------|-------|-----------------------------------------------------------------------|
| Sez_1822  | 967aa  | 37-38: AFA-KD | LPSSG | FszD, fimbrial subunit protein D of zooepidemicus (collagen-binding?) |
| Sez_1825  | 832aa  | 30-31: LYA-AT | LPATG | fibronectin-binding protein                                           |
| Sez_1828  | 304aa  | 27-28: IWA-QE | IPVTG | FszE, fimbrial subunit protein E of zooepidemicus (collagen-binding?) |
| Sez_1829  | 616aa  | 36-37: VKA-EE | IPNTG | FszF, fimbrial subunit protein F of zooepidemicus                     |
| Sez_1835  | 334aa  | 35-36: SKA-DS | --    | conserved protein function unknown                                    |
| Sez_1876  | 190aa  | 25-26: VLA-AD | --    | SlaA, streptococcal phospholipase A2                                  |
| Sez_1901  | 626aa  | 37-38: VYG-NV | LPATG | <i>S. equi</i> immunoreactive protein Se68.9 ortholog/ M-like         |
| *Sez_1908 | 271aa  |               |       | <i>S. equi</i> immunoreactive protein Se68.9 ortholog/ M-like         |
| Sez_1909  | 212aa  | 45-46: VYG-DV | LPATG |                                                                       |
| Sez_1910  | 233aa  |               |       |                                                                       |
| Sez_1936  | 203aa  | 31-32: AFS-SE | --    | extracellular protein staphylococcal antigen A-like                   |
| Sez_1960  | 407aa  | 43-44: AKG-AT | --    | serine protease processing/maturation of secreted proteins            |

\* Unconfirmed fragmented gene in the sequence assembly.
