# Supplementary material for: Genome Sequence of a Lancefield Group C Streptococcus zooepidemicus Strain Causing Epidemic Nephritis: New Information about an Old Disease
Source: PubMed Central journal article supplement (PMC2516327; doi:10.1371/journal.pone.0003026), 2008-08-21
Supplement: pone.0003026.s003.pdf [file pone.0003026.s003.pdf]

**Table S2. Products with Predicted Lipidation Signal Sequence**

| <b>Gene Tag</b> | <b>Length</b> | <b>Cleavage Site</b> | <b>Function and/or Product</b>                   |
|-----------------|---------------|----------------------|--------------------------------------------------|
| Sez_0195        | 416aa         | 30-31: LSA-CA        | PG endopeptidase                                 |
| Sez_0237        | 269aa         | 19-20: LVA-CG        | membrane/secreted protein processing             |
| Sez_0246        | 437aa         | 21-22: LAA-CG        | ABC transporter NeuNAc-binding lipoprotein       |
| Sez_0271        | 284aa         | 21-22: LAA-CG        | 5'-nucleotidase                                  |
| Sez_0279        | 552aa         | 27-28: LMA-CG        | ABC transporter oligopeptide-binding lipoprotein |
| Sez_0373        | 294aa         | 19-20: LSA-CV        | ABC transporter Fe(3+)-binding lipoprotein       |
| Sez_0462        | 291aa         | 19-20: LGA-CQ        | conserved protein function unknown               |
| Sez_0473        | 322aa         | 22-23: LGA-CG        | ABC transporter D-ribose-binding lipoprotein     |
| Sez_0503        | 361aa         | 25-26: LSA-CH        | conserved protein function unknown               |
| Sez_0559        | 223aa         | 26-27: LTA-CS        | secreted protein processing/maturation           |
| Sez_0666        | 333aa         | 22-23: LAA-CQ        | secreted protein processing/maturation           |
| Sez_0679        | 746aa         | 22-23: LTA-CQ        | Internalin A-like protein                        |
| Sez_0813        | 269aa         | 15-16: VAG-CL        | C-family fimbrial sortase                        |
| Sez_0831        | 270aa         | 21-22: LAA-CG        | ABC transporter polar AA-binding lipoprotein     |
| Sez_0888        | 278aa         | 21-22: LVA-CG        | ABC transporter AA-binding lipoprotein           |
| Sez_0911        | 288aa         | 22-23: LSA-CS        | ABC transporter phosphate-binding lipoprotein    |
| Sez_0936        | 350aa         | 20-21: LVG-CG        | ABC transporter nucleoside-binding lipoprotein   |
| Sez_1017        | 146aa         | 20-21: LSA-CD        | hitidine triad lipoprotein                       |
| Sez_1018        | 313aa         | 25-26: LSA-CH        | laminin-binding lipoprotein, Lmb                 |
| Sez_1097        | 236aa         | 18-19: LVA-CL        | muramidase                                       |
| Sez_1137        | 216aa         | 32-33: LSA-CS        | conserved protein function unknown               |

| <b>Gene Tag</b> | <b>Length</b> | <b>Cleavage Site</b> | <b>Function and/or Product</b>                           |
|-----------------|---------------|----------------------|----------------------------------------------------------|
| Sez_1155        | 294aa         | 25-26: LAA-CA        | ABC transporter cystine-binding lipoprotein              |
| Sez_1257        | 417aa         | 23-24: LVG-CA        | ABC transporter maltose/maltodextrin-binding lipoprotein |
| Sez_1266        | 419aa         | 24-25: LSA-CS        | ABC transporter maltose/maltodextrin-binding lipoprotein |
| Sez_1367        | 290aa         | 21-22: LAA-CG        | ABC transporter phosphate-binding lipoprotein            |
| Sez_1456        | 540aa         | 19-20: LTA-CQ        | ABC transporter oligopeptide-binding lipoprotein         |
| Sez_1466        | 268aa         | 19-20: LSG-CE        | cyclophilin-like cis-trans isomerase                     |
| Sez_1469        | 310aa         | 20-21: LVA-CS        | ABC transporter Fe(3+)-binding lipoprotein               |
| Sez_1501        | 496aa         | 37-38: LTA-CG        | ABC transporter sugar-binding lipoprotein                |
| Sez_1605        | 193aa         | 21-22: LSA-CR        | conserved protein function unknown                       |
| Sez_1619        | 312aa         | 19-20: LVA-CS        | ABC transporter Fe(3+)-binding lipoprotein               |
| Sez_1654        | 306aa         | 23-24: LTG-CV        | membrane/secreted protein processing                     |
| Sez_1679        | 281aa         | 21-22: LVA-CS        | ABC transporter D-Met-binding lipoprotein                |
| Sez_1680        | 281aa         | 22-23: LAA-CG        | ABC transporter amino acid-binding lipoprotein           |
| Sez_1697        | 658aa         | 22-23: LAA-CG        | ABC transporter oligopeptide-binding lipoprotein         |
| Sez_1736        | 313aa         | 26-27: LVA-CS        | Zn/laminin-binding lipoprotein, LraI-like                |
| Sez_1790        | 847aa         | 23-24: LTA-CG        | Internalin A-like histidine triad lipoprotein            |
| Sez_1838        | 320aa         | 19-20: LVA-CR        | ABC transporter substrate-binding lipoprotein            |
| Sez_1839        | 328aa         | 28-29: LTA-CR        | ABC transporter substrate-binding lipoprotein            |
