# Supplementary material for: Genome Sequence of a Lancefield Group C Streptococcus zooepidemicus Strain Causing Epidemic Nephritis: New Information about an Old Disease
Source: PLoS One. 2008 Aug 21;3(8):e3026. doi: 10.1371/journal.pone.0003026 (PMC2516327; doi:10.1371/journal.pone.0003026)
Supplement: Table S3 — Products with Predicted Double-Glycine Secretion Signal Sequence. Inferred proteins with bacteriocin/competenece peptide-like double-glycine secretion signal sequence (0.04 MB PDF) [file pone.0003026.s004.pdf]

**Table S3. Products with Predicted Double-Glycine Secretion Signal Sequence**

| Gene Tag | Length | Cleavage Site | Product/Function                        |
|----------|--------|---------------|-----------------------------------------|
| Sez_0490 | 67aa   | 37-38: GG-CC  | streptolysin S precursor, SagA          |
| Sez_0518 | 46aa   | 19-20: GG-AW  | putative competence stimulating peptide |
| Sez_0519 | 43aa   | 18-19: GG-FD  | putative competence stimulating peptide |
| Sez_0520 | 55aa   | 18-19: GG-AV  | putative competence stimulating peptide |
| Sez_0965 | 66aa   | 23-24: GG-WG  | bacteriocin                             |
| Sez_0969 | 76aa   | 23-24: GG-NC  | bacteriocin                             |
| Sez_1195 | 61aa   | 17-18: GG-TG  | bacteriocin                             |
| Sez_1200 | 51aa   | 24-25: GG-WD  | bacteriocin/pheromone BlpC-like         |
| Sez_1516 | 67aa   | 18-19: GG-NP  | bacteriocin/pheromone BlpN-like         |
| Sez_1517 | 84aa   | 23-24: GG-KN  | bacteriocin/pheromone BlpM-like         |
| Sez_1522 | 98aa   | 19-20: GG-KG  | bacteriocin/pheromone BlpC-like         |
| Sez_1525 | 44aa   | 25-26: GG-WL  | bacteriocin/pheromone bovicin-like      |
| Sez_1529 | 67aa   | 22-23: GG-KI  | bacteriocin enhancer peptide ThmB-like  |
| Sez_1530 | 85aa   | 24-25: GG-YS  | bacteriocin ThmA-like                   |
| Sez_1606 | 64aa   | 12-13: GG-KN  | bacteriocin/pheromone BlpM-like         |
