# Supplementary material for: Genome Sequence of a Lancefield Group C Streptococcus zooepidemicus Strain Causing Epidemic Nephritis: New Information about an Old Disease
Source: PLoS One. 2008 Aug 21;3(8):e3026. doi: 10.1371/journal.pone.0003026 (PMC2516327; doi:10.1371/journal.pone.0003026)
Supplement: Table S4 — Insertion Sequence Elements (0.09 MB PDF) [file pone.0003026.s005.pdf]

**Table S4. Insertion Sequence Elements**

| MGCS10565<br>Locus Tag | Length<br>(aa) | ISFinder |        |       |                                           | Note                                  | Intact or Fragmented          |
|------------------------|----------------|----------|--------|-------|-------------------------------------------|---------------------------------------|-------------------------------|
|                        |                | Best Hit | Family | Group | Origin                                    |                                       |                               |
| Sez_0095               | 186            | IS1193D  | ISL3   |       | Streptococcus pneumoniae SP-VA96          | IS1193D C-terminal fragment           | IS1167/IS1193D-like fragments |
| Sez_0096               | 155            | IS1193D  | ISL3   | -     | Streptococcus thermophilus CNRZ368        | IS1193D N-terminal fragment           | IS1167/IS1193D-like fragments |
| Sez_0097               | 60             | IS652    | ISL3   | -     | Bacillus halodurans C-125                 | IS1193D-like fragment                 | IS1167/IS1193D-like fragments |
| Sez_0121               | 267            | IS861B   | IS3    | IS150 | Streptococcus agalactiae COH-I            | IS861 orfB                            | intact                        |
| Sez_0122               | 171            | IS861A   | IS3    | IS150 | Streptococcus agalactiae COH-I            | IS861 orfA                            | intact                        |
| Sez_0180               | 573            | ISMbov3  | IS1634 | -     | Mycoplasma bovis                          | IS4-like Desulfitobacterium hafniense | intact                        |
| Sez_0196               | 317            | IS1239   | IS30   | -     | Streptococcus pyogenes MGAS1898 (M15)     | IS1239                                | intact                        |
| Sez_0210               | 476            | IS663    | ISNCY  | -     | Bacillus halodurans C-125                 | IS663-like                            | intact                        |
| Sez_0295               | 171            | IS861A   | IS3    | IS150 | Streptococcus agalactiae COH-I            | IS861 orfA                            | intact                        |
| Sez_0296               | 267            | IS861B   | IS3    | IS150 | Streptococcus agalactiae COH-I            | IS861 orfB                            | intact                        |
| Sez_0345               | 171            | IS861A   | IS3    | IS150 | Streptococcus agalactiae COH-I            | IS861 orfA                            | intact                        |
| Sez_0346               | 267            | IS861B   | IS3    | IS150 | Streptococcus agalactiae COH-I            | IS861 orfB                            | intact                        |
| Sez_0507               | 376            | IS1548   | ISAs1  | -     | Streptococcus agalactiae Mc1 serotype III | IS1548-like                           | intact                        |
| Sez_0529               | 430            | IS1193D  | ISL3   | -     | Streptococcus thermophilus CNRZ368        | IS1193D                               | intact                        |
| Sez_0555               | 96             | IS1167   | ISL3   | -     | Streptococcus pneumoniae CP1200           | IS1193D-like fragment                 | IS1167/IS1193D-like fragments |
| Sez_0556               | 78             | ISSmu2   | ISL3   | -     | Streptococcus mutans                      | IS1193D-like fragment                 | IS1167/IS1193D-like fragments |
| Sez_0557               | 231            | IS1193D  | ISL3   | -     | Streptococcus thermophilus CNRZ368        | IS1193D-like fragment                 | IS1167/IS1193D-like fragments |
| Sez_0733               | 171            | IS1A     |        |       | Escherichia coli                          | IS1 orf A                             | intact                        |
| Sez_0734               | 239            | IS1B     |        |       | Escherichia coli                          | IS1 orf B                             | intact                        |

| MGCS10565<br>Locus Tag | Length<br>(aa) | ISFinder |             |       |                                                | Note                                  | Intact or Fragmented          |
|------------------------|----------------|----------|-------------|-------|------------------------------------------------|---------------------------------------|-------------------------------|
|                        |                | Best Hit | Family      | Group | Origin                                         |                                       |                               |
| Sez_0775               | 112            | IS1193D  | ISL3        |       | Streptococcus thermophilus CNRZ368             | IS1167/IS1193D-like fragment          | IS1167/IS1193D-like fragments |
| Sez_0819               | 92             | ISRhba1  | IS1595      |       | Rhodobacterales bacterium                      |                                       | fragment                      |
| Sez_0875               | 376            | IS1548   | ISAs1       | -     | Streptococcus agalactiae Mc1 serotype III      | IS1548-like                           | intact                        |
| Sez_0955               | 317            | IS1239   | IS30        | -     | Streptococcus pyogenes MGAS1898 (M15)          | IS1239                                | intact                        |
| Sez_0957               | 376            | IS1548   | ISAs1       | -     | Streptococcus agalactiae Mc1 serotype III      | IS1548-like                           | intact                        |
| Sez_0980               | 573            | ISMbov3  | IS1634      | -     | Mycoplasma bovis                               | IS4-like Desulfitobacterium hafniense | intact                        |
| Sez_1096               | 137            | ISBth5   | IS4         | IS231 | Bacillus thuringiensis                         | IS4 family fragment                   | fragment                      |
| Sez_1112               | 267            | IS861B   | IS3         | IS150 | Streptococcus agalactiae COH-I                 | IS861 orfB                            | intact                        |
| Sez_1113               | 171            | IS861A   | IS3         | IS150 | Streptococcus agalactiae COH-I                 | IS861 orfA                            | intact                        |
| Sez_1115               | 317            | IS1239   | IS30        | -     | Streptococcus pyogenes MGAS1898 (M15)          | IS1239                                | intact                        |
| Sez_1116               | 317            | ISXc5    | Tn3         | ISXc4 | Xanthomonas campestris pv. citri XW45 (pXW45J) |                                       | ?                             |
| Sez_1141               | 232            | IS1202   | ISNCY       | -     | Streptococcus pneumoniae SSZ serotype 19F      | IS1202 fragment                       | intact                        |
| Sez_1142               | 104            | IS1202   | ISNCY       | -     | Streptococcus pneumoniae SSZ serotype 19F      | IS1202 fragment                       | intact                        |
| Sez_1143               | 150            | IS1202   | ISNCY       | -     | Streptococcus pneumoniae SSZ serotype 19F      | IS1202 fragment                       | intact                        |
| Sez_1201               | 65             | ISPlu5   | IS200/IS605 |       | Photobacterium luminescens subsp. laumondii    | IS200-like fragment                   | intact                        |
| Sez_1202               | 157            | ISPlu5   | IS200/IS605 |       | Photobacterium luminescens subsp. laumondii    | IS200-like                            | intact                        |
| Sez_1325-1326          |                |          |             |       |                                                | IG fragments                          | fragments                     |
| Sez_1342               | 267            | IS861B   | IS3         | IS150 | Streptococcus agalactiae COH-I                 | IS861 orfB                            | intact                        |
| Sez_1343               | 171            | IS861A   | IS3         | IS150 | Streptococcus agalactiae COH-I                 | IS861 orfA                            | intact                        |
| Sez_1348-1349          | -              |          | IS3         |       |                                                | fragments                             | IG fragments                  |

| MGCS10565<br>Locus Tag | Length<br>(aa) | ISFinder    |        |       |                                           | Note                                  | Intact or Fragmented |
|------------------------|----------------|-------------|--------|-------|-------------------------------------------|---------------------------------------|----------------------|
|                        |                | Best Hit    | Family | Group | Origin                                    |                                       |                      |
| Sez_1362               | 573            | ISMbov3     | IS1634 | -     | Mycoplasma bovis                          | IS4-like Desulfitobacterium hafniense | intact               |
| Sez_1458               | 71             | IS1167      | ISL3   | -     | Streptococcus pneumoniae CP1200           | ISL3 family fragment                  | fragment             |
| Sez_1461               | 317            | IS1239      | IS30   | -     | Streptococcus pyogenes MGAS1898 (M15)     | IS1239                                | intact               |
| Sez_1491               | 228            | ISSau2-A    | IS3    | IS150 | Staphylococcus aureus subsp. aureus       | ISSth1 orfA                           | intact               |
| Sez_1492               | 123            | ISSau2-B    | IS3    | IS150 | Staphylococcus aureus subsp. aureus       | ISSth1 orfB                           | intact               |
| Sez_1493               | 147            | ISBcen10    | IS3    | IS150 | Burkholderia cenocepacia                  | ISSth1 orfC                           | intact               |
| Sez_1519               | 171            | IS861A-like | IS3    | IS150 | Streptococcus agalactiae COH-I            | IS861 orfA                            | intact               |
| Sez_1520               | 278            | IS861B-like | IS3    | IS150 | Streptococcus agalactiae COH-I            | IS861 orfB                            | intact               |
| Sez_1528               | 317            | IS1239      | IS30   | -     | Streptococcus pyogenes MGAS1898 (M15)     | IS1239                                | intact               |
| Sez_1533               | 171            | IS861A      | IS3    | IS150 | Streptococcus agalactiae COH-I            | IS861 orfA                            | intact               |
| Sez_1534               | 267            | IS861B      | IS3    | IS150 | Streptococcus agalactiae COH-I            | IS861 orfB                            | intact               |
| Sez_1544               | 122            | ISSg1       | ISL3   | -     | Streptococcus gordonii M5                 | ISL3 family fragment                  | fragment             |
| Sez_1624-1625          |                | IS1167      | ISL3   | -     | Streptococcus pneumoniae CP1200           | IG fragments                          | fragments            |
| Sez_1652               | 573            | ISMbov3     | IS1634 | -     | Mycoplasma bovis                          | IS4-like Desulfitobacterium hafniense | intact               |
| Sez_1738               | 376            | IS1548      | ISAs1  | -     | Streptococcus agalactiae Mc1 serotype III | IS1548-like                           | intact               |
| Sez_1747               | 317            | IS1239      | IS30   | -     | Streptococcus pyogenes MGAS1898 (M15)     | IS1239                                | intact               |
| Sez_1840               | 317            | IS1239      | IS30   | -     | Streptococcus pyogenes MGAS1898 (M15)     | IS1239                                | intact               |
| Sez_1841               | 232            | IS1202      | ISNCY  | -     | Streptococcus pneumoniae SSZ serotype 19F | IS1202 fragment                       | intact               |
| Sez_1842               | 104            | IS1202      | ISNCY  | -     | Streptococcus pneumoniae SSZ serotype 19F | IS1202 fragment                       | intact               |
| Sez_1843               | 150            | IS1202      | ISNCY  | -     | Streptococcus pneumoniae SSZ serotype 19F | IS1202 fragment                       | intact               |

| MGCS10565<br>Locus Tag | Length<br>(aa) | ISFinder |        |       |                                       | Note        | Intact or Fragmented |
|------------------------|----------------|----------|--------|-------|---------------------------------------|-------------|----------------------|
|                        |                | Best Hit | Family | Group | Origin                                |             |                      |
| Sez_1868               | 147            | ISBcen10 | IS3    | IS150 | Burkholderia cenocepacia              | ISSth1 orfC | intact               |
| Sez_1869               | 123            | ISSau2-B | IS3    | IS150 | Staphylococcus aureus subsp. aureus   | ISSth1 orfB | intact               |
| Sez_1870               | 228            | ISSau2-A | IS3    | IS150 | Staphylococcus aureus subsp. aureus   | ISSth1 orfA | intact               |
| Sez_1871               | 171            | IS861A   | IS3    | IS150 | Streptococcus agalactiae COH-I        | IS861 orfA  | intact               |
| Sez_1872               | 267            | IS861B   | IS3    | IS150 | Streptococcus agalactiae COH-I        | IS861 orfB  | intact               |
| Sez_1877               | 317            | IS1239   | IS30   | -     | Streptococcus pyogenes MGAS1898 (M15) | IS1239      | intact               |
| Sez_1896               | 430            | IS1193D  | ISL3   | -     | Streptococcus thermophilus CNRZ368    | IS1193D     | intact               |
| Sez_1923               | 430            | IS1193D  | ISL3   | -     | Streptococcus thermophilus CNRZ368    | IS1193D     | intact               |
